# Supplementary material for: A cell atlas of the chick retina based on single-cell transcriptomics
Source: eLife. 2021 Jan 4;10:e63907. doi: 10.7554/eLife.63907 (PMC7837701; doi:10.7554/eLife.63907)
Supplement: Supplementary file 1. [file elife-63907-supp1.xlsx]

## Sheet: Sheet1
Gene	PCR oligo (5')	PCR oligo (3')	Length
ARHGAP18	CGTGAACTGCCTCAACCACTCCTAAC	GAGTCTTGTCCTGCTTCTCGTGCTTT	490
BCAS1	GAGATAGATGACTGCAACCAGAG	TAGGAGTGGACGATCCTTTCT	553
CALB1	GCTTGGACTTAACACCTGAAATG	GAGATCCTTCAGTAGTGCATCAA	503
CHODL	XATGGGGCTGGGACTGGGGCTGGC	ZTTATACCTCCATGCTACTGTCCT	FULL
CHRDL1	XATGAGAAGAAAGTGGAGATCGGA	ZTTAACAGTGACCCTTTTCAGACT	FULL
CHRNB2	TGTACGAGGTCTCCTTCTACTC	ATGCAGAGCGTCATCTTCTC	433
DACT2	XATGGGCGCTCCCCAGCTCGTCAG	ZTTAAACCATGGTCATAACCTTCA	FULL
EGFR	GGTCTAGGCATCGGTCTTTAC	CGTTCCTCCAGGTAGTTCATTC	512
ETV1	XATGGATGGATTTTATGACCAGCA	ZTTAATAGACGTAGCCTTCATTAT	FULL
FGF8	TCATGCACTTGTTCGTCCTC	GCTGGAGTTTCGAGTCCTTT	593
GRIK1	GAACTCCTACAGTGGCCTTAAC	GCAGGCTAGGAGAACATACATC	496
GRTP1	AGAGGCCAGATGACTTTGATTAC	CCTGACAATATCCCACTGCTTTA	417
IPCEF1	XATGGAAGCTGATGGGAATGCCCT	ZTCATGTAGCACTTTCAGTGACAG	FULL
LOC419389	GGAAGCACGAGGACAGAAA	CGCGCTCTCCTGGAATAAA	451
LTK	GCAGCATCTCCTTGGTCTATC	GTCTTCCATCAGCAAAGCAATC	454
MAFA	XATGGCCTCGGAGTTGGCCATGAC	ZTCACATGAAGAAGTCAGCGGCAG	FULL
MMEL1	TGTTCTGCAGTCGCCCTGGTAAT	TCTTCCATGCTCCAGCTTGGTTCT	464
MOXD1	GATAACTCTGGTCTGAGGCTATTC	GTCCTGACTGGTCTGTAGATTTC	557
NPY	XATGCAGGGCACCATGAGGCTGTG	ZTCACCACATCGAAGGGTCTTCAA	FULL
NTRK1	CTTCCTCTCTGTCATGCTCATT	GGTCTCCATGCTTCATGTACTC	500
NTS	XATGAGAGCCCAGCTGGTGTGCGT	ZTCAGTAATATGAACTTCTCTTGA	FULL
OPN1LW	XATGGCGGCGTGGGAGGCGGCGTT	ZTTAGGCGGGCGAGACGGAGGAGT	FULL
OPN1MSW	XATGAATGGGACAGAAGGTATCAA	ZCTATGCAGGTGAAACTTGGCTGG	FULL
OPN4-1	TCTCCTGAGAGGCTCCATAAA	GGTTTGTCTCTGAGGTAGGAATG	518
OPRM1	TGCCATTCCAGAGTGTGAATTA	CACTGCCACCACTACAAGAA	503
OXT	XATGTTCTACAAGGCGCTCACCGT	ZCTATGCAAACAGCATTTCTTGGT	FULL
PDGFR	CTGATGTGGAATGGTTGGTTTG	GCTGGATCTAGCTGTAGGTTTC	581
PENK	XATGGCGTTGCTGCTGCGGCTCGG	ZTTAAAATCTCATAAATCCACCGT	FULL
PLP1	XATGGGTCTGTTGGAGTGCTGTGC	ZCTAGAACTTGGTGCCCCGGCCCA	FULL
PRDM8	TCTACGACAGCATCGCCTTCATC	CAGGTTGTGGAAGTCCGTGGAG	533
PRKCA	XATGGCCGACGTGTTCCCGGGCTC	ZTCATGCTACATTTTCTAGGAGGG	FULL
PSCA	XATGAAGGTTTTCTTCATCCTCCT	ZTCACAGTCTGTTGTTCAGGAAGG	FULL
RRAD	XATGACTCTGAACCGCGGCGACAA	ZCTAAAGCACAGATAAGTCATGGC	FULL
RUNX1	GTACCACAGAGCCATCAAGATAA	CCGTGGACATAGCAGACATAC	590
RUNX2	XATGGCATCAAACAGCCTCTTCAG	ZTCAGTACGGCCTCCAAACGGACT	FULL
SLC6A4	TGGGAGACAGAGAGACCTGGAGTAAA	GCACCTGTAGAACTTGGCGGGTATAA	492
SLIT1	ATGGACAACTCGGGCAAGCACTA	TAGCCGCTGTGGCACTCACATAC	536
STRA6	XATGGCAGCCAACAACTCCGGGGC	ZTCAGGGCCTGGGGGGGCTGAGCT	FULL
TAC1	CGTCGCCAGGTCTATAAAGTG	TCGCTCGTAATTCTGTGCTATG	429
TMEM123	XATGCGGCTCATCTTTTCCGGCGC	ZTTAAATGATGGCATCGTGTTCAT	FULL
TPBGL	XATGGTCCGCAGGACGCGGCGGGC	ZTCAGAGCCCCGGGGTGCCGACGG	FULL
WIF1	XATGGCCGCGGCGGGGCGGCTGTG	ZTCACCAGATATAATTGGATTCGG	FULL
ZIC1	XATGCTTCTGGATGCTGGACCGCA	ZTTACACGTACCATTCGTTAAAAT	FULL
SLC17A8 (VG3)	ATCACTTGGACATAGCCC	GCTTTCTCCATTGCCTTCTC	379
TPBG	CTCAACCTCAGCGACAACT	GTGATATCCCTCCATGTGATCC	423
FOXG1	GCCACAACCTCTCTCTCAATAA	CGAGTCTATCGACGCTCAAC	414
FOXI2	CCTCAGCCAGATCTACCAATAC	TCAGTGCATCTCTCCGT	301
for cloning into pCMV-script	X=TAAACGGCCGGCCGTCGACTCGAGGCCACC	Z=AATTGGGTACACTTACCTGGTACC
