# Supplementary material for: A cell atlas of the chick retina based on single-cell transcriptomics
Source: eLife. 2021 Jan 4;10:e63907. doi: 10.7554/eLife.63907 (PMC7837701; doi:10.7554/eLife.63907)
Supplement: Supplementary file 2. [file elife-63907-supp2.xlsx]

## Sheet: Sheet1
GENE	CRISPR Target sequence	Arm1 (5' side)	Arm2 (3' side)
ETV1	TGGAAGAGCCACAGGATGGA	ETV1-GFP-F	ETV1-GFP-R
		GATCCCGAGGAAATCTCCAGATCCAATGCCCACTAAATAAAACACTGAGCTCAGACTCGTGGAAGAGCCACAGGATGGTGAGCAAGGGCGAGGAG	AAACACCAACTTTAAGCTGATCACTCACATTGGTGACCATGTAAGGCACTTGCTGGTCATAAAATCCATCTTACTTGTACAGCTCGTCCATGC
		ETV1-Cre-F	ETV1-Cre-R
		CCGAGGAAATCTCCAGATCCAATGCCCACTAAATAAAACACTGAGCTCAGACTCGTGGAAGAGCCACAGGATGGCCAATTTACTGACCGT	AAACACCAACTTTAAGCTGATCACTCACATTGGTGACCATGTAAGGCACTTGCTGGTCATAAAATCCATCTTAATCGCCATCTTCCAGCA
RBPMS2	TATTGAGGTTACTCATGATG	RBPMS2-HA
		CACCGCACGGCACCCGCTCCCCGCTCGGAGCTGCTGTTCCACTCCCCTTCACACCCCCCCGGCCCCCCATCATGTACCCATACGATGTTCCAGATTACGCTAGTAACCTCAATAAGGACACCGAACACACCAACGGCGGAGGGAACGTCGAGGAGGAGGTGGGAGCTCGTG
		RBPMS2-Cre-F	RBPMS2-Cre-R
		ACCGCACGGCACCCGCTCCCCGCTCGGAGCTGCTGTTCCACTCCCCTTCACACCCCCCCGGCCCCCCATCATGGCCAATTTACTGACCGT	CACGAGCTCCCACCTCCTCCTCGACGTTCCCTCCGCCGTTGGTGTGTTCGGTGTCCTTATTGAGGTTACTTTAATCGCCATCTTCCAGCA
TFAP2A	AGAGCATTTTCATGGGTCGG	TFAP2A-GFP-F	TFAP2A-GFP-R
		CGGCTCTGCACAGCTCCGCCGCGCTCCGCAGCACCGCGCCGGGGGGATCGGACCCTCTCCCGCCGACCCATGGTGAGCAAGGGCGAGGAG	GGCCCTGGCGGGCGCTTACCTCGCACTCCTCGTACTTGATGTTATCCGTCAGCTTCCAGAGCATTTTTTACTTGTACAGCTCGTCCATGC
		TFAP2A-Cre-F	TFAP2A-Cre-R
		CGGCTCTGCACAGCTCCGCCGCGCTCCGCAGCACCGCGCCGGGGGGATCGGACCCTCTCCCGCCGACCCATGGCCAATTTACTGACCGT	GGCCCTGGCGGGCGCTTACCTCGCACTCCTCGTACTTGATGTTATCCGTCAGCTTCCAGAGCATTTTTTAATCGCCATCTTCCAGCA
TPBGL	GCATGGTCCGCAGGACGCGG	TPBGL-GFP-F	TPBGL-GFP-R
		GGGCGGGGGGAGCAGGCAGGCAGACAGCCCCCCCTCCCCCCCCGGCCCCTGCATGCTCCAGCGCCGGGCATGGTGAGCAAGGGCGAGGAG	AGGCGAGCCCCAACCAGGGCAGCCCCAAGCAGGGCAGCCCCAGCCCCGCCGCCCGCCGCGTCCTGCGGACTTACTTGTACAGCTCGTCCA
ERBB4	GCTCCACCACAGCAGCCCCC	ERBB4-GFP-F	ERBB4-GFP-R
		AGGCGGCGGCGCTGAGGAGGAGGAAGAGGAGGCGGCGGCGGCGGCGGCGGCGCGATGCCGGCGGCGGCCGGGGTGAGCAAGGGCGAGGAG	GCGCCGCGGCAGCCCTCGGGGCGCCGGCCGCCGCCGCCGCCAGCACGCAGCAGCTCCACCACAGCAGCCCTTACTTGTACAGCTCGTCCA
RRAD	CGCCGCGGTTCAGAGTCATG	RRAD-GFP-F	RRAD-GFP-R
		GGCGCGGGGCCGGAGCGGGGAGCGCGGGGCTCTGACGACTCTTCTCCGCGTTCGCAGCCCGGCGTCCCCATGGTGAGCAAGGGCGAGGAG	GTGCGGAGAAAGGCATGCTGCCGCGCCGCTTGTCTAGGTAGCGCAGCTTGTCGCCGCGGTTCAGAGTTTACTTGTACAGCTCGTCCATGC
ANGPT2	CAGCCGCATCTTCCCGCCCG	ANGPT2-GFP-F	ANGPT2-GFP-R
		CCGCCCGCAGCGCATGGCCGCGGGGCGCTGAGCTCCGAGCTCCGGGCCGGGACCTCCGCGGGCGGGAAGATGGTGAGCAAGGGCGAGGAG	TCCCGAAGGCGTTGTATCCCGCGGCGAGAACGATGCTGCAGCCCCACGTGAAGTAGACGCTCAGCCGCTACTTGTACAGCTCGTCCATGC
IRX3	GCCCAGCTGCGGGAACGACA	IRX3-GFP-F	IRX3-GFP-R
		CCTTTCTCTCCCTTCTTCCCTTCTGCCCCCCCCTCCCTACCCTTCCCCCCTCCCCACCCCCCCCGCACCATGGTGAGCAAGGGCGAGGAG	AGCCGCCGCTGCCCGGGCGCTCGGCGGGGTACAGCGGCCTGATGTACTGGTAGCCCAGCTGCGGGAACGATTACTTGTACAGCTCGTCCA
CALB1	CTGCACCCCCATCATGACGG	CALB1-GFP-F	CALB1-GFP-R
		CCGCTCCGGCCGCGGGCACAGTCAGCACCGCGGACAGCGCCCCCGCTGAGCCCCCTCTGCACCCCCATCATGGTGAGCAAGGGCGAGGAG	AGTGGTGCCAGATCTCGAAGAACTGGGCGGCCGAGATCTCCACGCCCTGCAGGTGCGTCTCCGCCGTCTACTTGTACAGCTCGTCCATGC
NTS	CAACACCACGCACACCAGCT	NTS-GFP-F	NTS-GFP-R
		TGTCTGTCTCTCTCTCCGTCTCTCCCCAGGATTTATGGACTTTACTTTCTAGAGAGCGGCGCGACAAGGATGGTGAGCAAGGGCGAGGAG	GGGGCTTACCTGAGCAGAGGCTGCAGGAGGCCAAGGCCAGCAACACCACGCACACCAGCTGGGCTCTTTACTTGTACAGCTCGTCCATGC
VSX2	GACCGACGGCCGCAGCATGA	VSX2-HA
		CTGGGCGGATAAAAGGGGCCTGAGCCGGGGGCTCCCAGGCATTCCCGGAGCGGGCACCAGGGACCGACGGCCGCAGCATGTACCCATACGATGTTCCAGATTACGCTACGGGCAAAGCGGGCGCGGCGCTGGCCCCCAGCCTGCCCGGCAAGCCCAAGCCCGACGGCGCGGCCGCCGCCGCCCCGCC
		VSX2-GFP-F	VSX2-GFP-R
		CTGGGCGGATAAAAGGGGCCTGAGCCGGGGGCTCCCAGGCATTCCCGGAGCGGGCACCAGGGACCGACGGCCGCAGCATGGTGAGCAAGGGCGAGGAG	GGGGCGGCGGCGGCCGCGCCGTCGGGCTTGGGCTTGCCGGGCAGGCTGGGGGCCAGCGCCGCGCCCGCTTTGCCCGTTTACTTGTACAGCTCGTCCATGC
SLC6A4	CAACTGGGCAGGAGAAACCT	SLC6A4-GFP-F	SLC6A4-GFP-R
		GGGAAAATAAGCTGAAGGGGACTGTGTGCTGCTGCCTATCTGCAACTGGGCAGGAGAAACCTTGGAAAAATGGTGAGCAAGGGCGAGGAG	CGTTACAGTCTGAGATACCTTTCTTGGAAGTCAGTGGCTGAGTCTCATTGCTCGTTGCCTTATTTTCTTACTTGTACAGCTCGTCCATGC
MC5R	TTCAGAAACATACAGTTGCG	MC5R-GFP-F	MC5R-GFP-R
		ACACTCCTTGGCAAGTCCCTCAGAGAGAAGAGAAAGTGTTTGCTTCCAGACATGAACACATCCTCGCAAATGGTGAGCAAGGGCGAGGAG	ACTTGCTCTTGACAGTAGGCACAGTAAAGTTGCTGCCAAAGGCACTCAGGTTTAGTTCAGAAACATACTACTTGTACAGCTCGTCCATGC
TFAP2D	GCTTGGATGCCTGGAGTCCG	TFAP2D-GFP-F	TFAP2D-GFP-R
		CAGTTTTGGGGTCTTCTTTTCACTTCTTCCTTTCAGATACGTCATGACGGATCAAACAGTTACCGTTTGATGGTGAGCAAGGGCGAGGAG	AAGTGAGAGGAGACGAGGAGGAATAGGCGACGGTCGAGTTGGCCACGGACTCCAGGCATCCAAGCTGCTACTTGTACAGCTCGTCCATGC
		Red: Strand used for single strand amplification
		Blue: Synthesized single strand DNA
